# Supplementary material
Source: PubMed Central journal article supplement (PMC3911480)
Supplement: MCB.01090-13_zmb999100306so2.pdf [file MCB.01090-13_zmb999100306so2.pdf]

| Strain Number | Genotype                                                                                 | Source                        |
|---------------|------------------------------------------------------------------------------------------|-------------------------------|
| SKY299        | <i>MATa sml1::kanaMX mec1::HIS3 ndd1::KanaMX p[GAL1-10 NDD1 CEN URA3] LEU2::GFP-TUB1</i> | (28) & this study             |
| SKY298        | <i>MATa ndd1::KanaMX p[GAL1-10 NDD1 CEN URA3] LEU2::GFP-TUB1</i>                         | This study                    |
| JV751         | <i>MATa sml1::kanaMX mec1::HIS3 ndd1::KanaMX p[GAL1-10 NDD1 CEN URA3]</i>                | This study                    |
| SKY305        | <i>MATa cdc13-1 URA3::GFP-TUB1 LEU2::NDD1-HA6</i>                                        | Etienne Schwob and this study |
| SKY322        | <i>MATa sml1::kanMX mec1::HIS3 URA3::GFP-TUB1</i>                                        | (28) & this study             |
| MK257         | <i>MATa SIN3-HA6::TRP1</i>                                                               | (5)                           |

| Plasmid Number | Details                                                                                                  | Source                  |
|----------------|----------------------------------------------------------------------------------------------------------|-------------------------|
| pSKY286        | YIP128 <i>GFP-TUB1 HIS3</i> promoter                                                                     | This study              |
| pSKY287        | PRS306 <i>GFP-TUB1 HIS3</i> promoter                                                                     | Gift from Frank Uhlmann |
| pSKY334        | YIPlac128 <i>NDD1-CD-11A</i> ( <i>S21/25/384/437/440/450/454/525/527/530A/T452V</i> )-HA native promoter | This study              |

|        |                                         |            |
|--------|-----------------------------------------|------------|
| pHEL06 | YCplac22 <i>NDD1-HA</i> native promoter | This study |
|--------|-----------------------------------------|------------|
